# Supplementary material for: Evolutional dynamics of 45S and 5S ribosomal DNA in ancient allohexaploid Atropa belladonna
Source: PubMed Central journal article supplement (PMC5260122; doi:10.1186/s12870-017-0978-6), 2017-01-23
Supplement: 12870_2017_978_MOESM2_ESM.pdf [file 12870_2017_978_MOESM2_ESM.pdf]

**Volkov et al.: 5S and 45S ribosomal DNA of *Atropa***

```

          10          20          30          40          50          60
-----+-----+-----+-----+-----+-----+
485 -----CCCTCCCCCTCCGAACCCCTCAACTTCTATCTTCTTCGAAA  Abel
75  CCCCCCCCACCTTCCCCCT...C.AA...AA.T..AA...-T....A...T.CAA..G  Sblb
488 -----.....ATT..AA...T..A..A..CT.....  Ntom

          70          80          90          100         110         120
-----+-----+-----+-----+-----+
526 GGAGGTTTACAAG----TCGCTTACTTG---TGATATGCC--GCTAAGTGTGAAAAGCT  Abel
134 .....T.TGTATTGC.T..A.C....GAAG..A.AAAAATA.C.....TTA  Sblb
529 A.....T.T-----TC...C....ATGCT....TATAT..C.....G...ATC  Ntom

          130         140         150         160         170         180
-----+-----+-----+-----+-----+
577 AAGTGTTTCGAGAGACTAAGGCTAAGTGTATTTTATTCTATGATAAGACTAAGGCCGTCAC  Abel
194 .GTC.CG----.T.A...CATGCTAC..GAA--...TAC.AG.TT.C.GCTAAGT..TGA  Sblb
581 G.ACAAGTCC-TC.A..CCATGG.AC.....C....TGTGT..T.AGTGTTAAAT..G..  Ntom

          190         200         210         220         230         240
-----+-----+-----+-----+-----+
637 TTGTGTAGGCAAACACATTGGCTAGATGAGTAGAC---GCATGCCATAATAATGTGGCCA  Abel
248 AC-.A..T.TT-CT.TGCC.ATC.A.AAGTCGTT.-----A...GCG...CCC.A.  Sblb
640 ...-TC.CTT.GT.GTT...TGGGA.A.GC.T.C.TAT.ACGCTA.ACCC...T.AA.TT  Ntom

          250
-----+-----
694 CTCGAGGTTTTTT      Abel
297 TG.....          Sblb
699 A.A.....          Ntom

```

**Figure S2** Nucleotide sequence comparison of 45S IGS structural region I (SR I) of *Atropa belladonna* (Abel), *Solanum bulbocastanum* (Sblb - Komarova et al. 2004) and *Nicotiana tomentosiformis* (Ntom - Volkov et al. 1999). Pyrimidine-rich motives present at the beginning of SRI in different Solanaceae species are boxed. Presumptive transcription termination signal **GAGGTTTTTT** at the end of SRI is shown in bold.
