# Supplementary material for: Evolutional dynamics of 45S and 5S ribosomal DNA in ancient allohexaploid Atropa belladonna
Source: PubMed Central journal article supplement (PMC5260122; doi:10.1186/s12870-017-0978-6), 2017-01-23
Supplement: 12870_2017_978_MOESM3_ESM.pdf [file 12870_2017_978_MOESM3_ESM.pdf]

**Volkov et al.: 5S and 45S ribosomal DNA of *Atropa***

```

          10          20          30          40          50          60
-----+-----+-----+-----+-----+-----+
2947 ATTAATGATTTTCTTATGTTGGGTATTCTTCCTAACATTCTTATATTTTTTTGAACATTTT  Abel
1822 ...TG...A...T.GG...A---A.T..ATA.TTT..-.G.....CCT.TT.G..  Sblb
3908 ..-TGGA.A...TC.CCA...----.T..T...TAT..A.A...A....CTT.TT....  Ntom

          70          80          90          100         110         120
-----+-----+-----+-----+-----+-----+
3007 CTAAATTT-TTAATTATTTTTT--AAATTT--AATTAATTATTATTAAAAAATAATTTT  Abel
1877 A.T.....AC..C.A.....CGG..T...CC..AA..AATAA.AATT.....G...G.  Sblb
3963 TGT.T...A...TG.....--CGT...AT...A...AT.....AT...A.  Ntom

          130         140         150         160         170         180
-----+-----+-----+-----+-----+-----+
3062 AT--AATAAAAAATATTATTTTTCAATGCTTACAAGTCATTAACGAACGCATTATATCGTT  Abel
1937 T-----G....C....T....AT..ATA..A.....TGT.G.A..TAATGTGT...  Sblb
4021 T.TTTG....T....C....A....T..A.....TGT...TAT....GC.AAG.  Ntom

          190         200         210         220         230         240
-----+-----+-----+-----+-----+-----+
3120 TGCACACGAAAACGTGCACGTTGGTGTGTAATTCGCCATTATGATTCTCTGGCACAGGC  Abel
1991 ..T..CTT.G.....TA..T.G.....CA.GTT.....A.A.AT.  Sblb
4081 ..T..TTCGTTT.....TT.....CA.GT.T.....CA.AA.  Ntom

          250         260         270         280
-----+-----+-----+-----
3180 ATGTCTACTCCTGCCACTTGGGTTTTTTTTTTTAAAGCATATATAA  Abel
2051 .....T...A.....-.....  Sblb
4141 .....T.....A.GA.....  Ntom

```

**Figure S3** Nucleotide sequence comparison of 45S IGS structural region III-B (SR III-B) of *Atropa belladonna* (Abel) and corresponding regions of *Solanum bulbocastanum* (Sblb) and *Nicotiana tomentosiformis* (Ntom).
