# Supplementary material for: Evolutional dynamics of 45S and 5S ribosomal DNA in ancient allohexaploid Atropa belladonna
Source: PubMed Central journal article supplement (PMC5260122; doi:10.1186/s12870-017-0978-6), 2017-01-23
Supplement: 12870_2017_978_MOESM4_ESM.pdf [file 12870_2017_978_MOESM4_ESM.pdf]

**Volkov et al.: 5S and 45S ribosomal DNA of *Atropa***

```

          10          20          30          40          50          60
-----+-----+-----+-----+-----+-----+
3226 GGGGGGTAGAGGTGTTGAA-GGCACTTCAGGGCGACTGTCGCC-GTTCGAGGCCAGCGCC Abel
2096 .....C.....G.-....GACTGA.....G.CA.G.-.GA..TCATGG...T. Sblb
4187 .....A.....C...A..T.CT..CT...T.GC.....GG..ATG Ntom

          70          80          90          100         110         120
-----+-----+-----+-----+-----+
3284 CAGTGGGGCATGTGGGCGTGTAGTAGGGGCACACTCGTGGCATGCATGGCCTCGTCCAAG Abel
2154 .T.....CTTA.....CT.CGT....G.-T.GA.....-T....GT. Sblb
4247 .-AC....G.C.CT...A..CG.CGT.....-T.G.G.....C...-T....GT. Ntom

          130         140         150         160         170         180
-----+-----+-----+-----+-----+
3344 CTACGCTAA-GGGTGTCAATCGAAAAACGCCGACGACGTCTCGCTGAGCGCCGGTAGTAG Abel
2212 .....CGTT...C.A.T.CAA...C.....G..T.TG.G...A.C..-..GC Sblb
4303 .....TCCC-A.A...TCGC-A.CGCGT.T.AG.A.GTA....T-.T.T..TC.....C Ntom

          190
-----+
3403 GGCGGCGG Abel
2271 C..T.A..GC Sblb
4360 .T.T.GT.GT Ntom

```

**Figure S4** Nucleotide sequence comparison of 45S IGS structural region IV (SR IV) of *Atropa belladonna* (Abel) and corresponding regions of *Solanum bulbocastanum* (Sblb) and *Nicotiana tomentosiformis* (Ntom).
