# Supplementary material for: Evolutional dynamics of 45S and 5S ribosomal DNA in ancient allohexaploid Atropa belladonna
Source: PubMed Central journal article supplement (PMC5260122; doi:10.1186/s12870-017-0978-6), 2017-01-23
Supplement: 12870_2017_978_MOESM5_ESM.pdf [file 12870_2017_978_MOESM5_ESM.pdf]

**Volkov et al.: 5S and 45S ribosomal DNA of *Atropa***

```

          10          20          30          40          50          60          70
-----+-----+-----+-----+-----+-----+-----+
3161 CGTGTCT-AGCGGGACTTGCTCCGGACTCGCAACGTCGGCATCGGAAGCGGCGCTCGGCATATAATGCCG Abel
2514 ..C.CAACG.....GA.A..AT...C..T....G.AA.....CGT...G..A.....G.C..... Sblb
5799 ....C..-G.....G....TCTT..CT.T....T..T.....T..C.A.AA.A.AT...-..-CGC.T.. Ntom

          80          90          100          110          120          130          140
-----+-----+-----+-----+-----+-----+-----+
3230 GGCATCGGGGCCGTTGTTTGGCACGCGACGACGAAAGCATTGTTGGACGCACGGCGCGTGAGTGGTGTGCGGGC Abel
2584 .....G.G..CCG...GT..AC.....TA..-C...T.....A.....A.T.... Sblb
5866 C.T..T.....T.....C-....T.TAT..G...G...AG..T...TG....A.A.....TC... Ntom

          150          160          170          180          190          200          210
-----+-----+-----+-----+-----+-----+-----+
3300 GTGTGCGGTTAGGTTGGATCCCTGCT-CGAGCAGCGACCTCTTAGCCCGCACGCAGGGTCAGTCGGGGGA Abel
2653 T..C.....T.....G..C..A.....T..C.T...G..G.C..AT Sblb
5935 T....T..C.....-T.T.....G..C.....T..CATC.....AT..C. Ntom

          220          230          240          250          260          270          280
-----+-----+-----+-----+-----+-----+-----+
3369 CAAGCGCCGCAAGGGCTTGCCCGAAGTCGGTTTCCAGTGTGCTGCATACCTAATGCCCGGCATTA-TCACG Abel
2723 .....AATCTA.....T.G..C.....A..T.....C.....G.G.....C..G.. Sblb
6004 .....AAATTA.....TT..GC.....T.T..T.....A.....-...A. Ntom

          290          300          310          320          330          340          350
-----+-----+-----+-----+-----+-----+-----+
3438 TACGATCGGTCGCCTTTCGCCCGTCGCATCCAGCGTGCGGGGCCGAACC-ACAAGCCGCTCCCGCGACCCA Abel
2793 .G.A.....CC...GCT.GA..C.....G.....C.G.....T....C.... Sblb
6073 C..A.....T.....C...G.T.GA.....GT.....-A...T..AGTT.T.T.... Ntom

          360          370          380          390          400          410          420
-----+-----+-----+-----+-----+-----+-----+
3507 CTCCTTCCTCGCCTCGCCGCGGATGGGGTGGTCCCGCGGAGGGCG-GTTCGGACTCTCGGATTCGGTAA Abel
2863 .G.....TC..T..T....G..C.C.....-...AGC.....-C.G.A.T.....G Sblb
6142 .G..A.....T...T..T.....TCTA.....-AT.ACTA.TAT.C..... Ntom

          430          440          450          460          470          480          490
-----+-----+-----+-----+-----+-----+-----+
3576 ACGCAGCGGGCACGGGGCATTC-----CCCATCTGCCCTC--ACGA-CGCTCCCTACGAACGACGGTC Abel
2931 .....C..ACCGGCT..T.....GA...AT.....T.G..G.....C. Sblb
6211 ....AT.....T...TC..ATTGGCT..T.....--A.A.AT.....T.....T..... Ntom

          500          510          520          530          540          550          560
-----+-----+-----+-----+-----+-----+-----+
3637 GCGCCCGCGCTGCACCCGACCGCGCCCATCCGGGCG-GGTCTGGCTCACGCGGCGC-CGACGTCTGCGAG Abel
3001 ....T...CT..GC...T.....T.T.....C..A.G..G...T.....G..G....GCT... Sblb
6278 .T..T..TCT..G..TT.G...T.G..T.TG..T..-.C.AT.....T...T..-.....AAT... Ntom

          566
-----+
3705 GAACGC 3705 Abel
3071 ...T.. 3076 Sblb
6345 ...T.. 6350 Ntom

```

**Figure S5** Nucleotide sequence comparison of 45S IGS structural region VI (SR VI) of *Atropa belladonna* (Abel) and corresponding regions of *Solanum bulbocastanum* (Sblb) and *Nicotiana tomentosiformis* (Ntom).
