# Supplementary material for: Evolutional dynamics of 45S and 5S ribosomal DNA in ancient allohexaploid Atropa belladonna
Source: PubMed Central journal article supplement (PMC5260122; doi:10.1186/s12870-017-0978-6), 2017-01-23
Supplement: 12870_2017_978_MOESM6_ESM.pdf [file 12870_2017_978_MOESM6_ESM.pdf]

**Volkov et al.: 5S and 45S ribosomal DNA of *Atropa***

CTTGGGTTTTTTTTTTTTTAAGCATATATAAGGGGGGTAGAGGTGTTGAAGGCACTTCAGG Majority  
 -----+-----+-----+-----+-----+-----+  
           10          20          30          40          50          60  
 -----+-----+-----+-----+-----+-----+  
 ..... Ab-IGS-1S  
 ..... Ab-ETS-4  
 ..... Ab-ETS-5  
 ..... T ..... Ab-ETS-6  
 ..... Ab-ETS-7  
 ..... Ab-ETS-8  
 ..... Ab-ETS-9  
 ..... Ab-ETS-10  
 ..... A ..... Ab-ETS-11  
 ..... C ..... Ab-ETS-12  
 ..... - ..... Ab-ETS-14  
 ..... G ..... Ab-ETS-15  
 ..... - - ..... Ab-ETS-16  
 ..... Ab-ETS-18  
 ..... Ab-ETS-19  
 ..... Ab-ETS-21

GCGACTGTCGCCGTTTCGAGGCCAGCGCCC-AGTGGGGCATGTGGGCGTGTAGTAGGGGCA Majority  
 -----+-----+-----+-----+-----+-----+  
           70          80          90          100          110          120  
 -----+-----+-----+-----+-----+-----+  
 ..... Ab-IGS-1S  
 ..... Ab-ETS-4  
 ..... Ab-ETS-5  
 ..... Ab-ETS-6  
 ..... Ab-ETS-7  
 ..... Ab-ETS-8  
 ..... Ab-ETS-9  
 ..... Ab-ETS-10  
 ..... C ..... Ab-ETS-11  
 ..... C ..... Ab-ETS-12  
 ..... Ab-ETS-14  
 ..... Ab-ETS-15  
 ..... Ab-ETS-16  
 ..... Ab-ETS-18  
 ..... Ab-ETS-19  
 ..... Ab-ETS-21

CACTCGTGGCATGCATGGCCTCGTCCAAGCTACGCTAAGGGTGTCAACCGAAAAACGCCG Majority  
 -----+-----+-----+-----+-----+-----+  
           130          140          150          160          170          180  
 -----+-----+-----+-----+-----+-----+  
 ..... T ..... Ab-IGS-1S  
 ..... Ab-ETS-4  
 ..... Ab-ETS-5  
 ..... Ab-ETS-6  
 ..... Ab-ETS-7  
 ..... Ab-ETS-8  
 ..... T ..... Ab-ETS-9  
 ..... Ab-ETS-10  
 ..... Ab-ETS-11  
 ..... Ab-ETS-12  
 ..... Ab-ETS-14  
 ..... Ab-ETS-15  
 ..... Ab-ETS-16  
 ..... Ab-ETS-18  
 ..... Ab-ETS-19  
 ..... Ab-ETS-21

**Volkov et al.: 5S and 45S ribosomal DNA of *Atropa***

```

ACGACGTCTCGCTGAGCGCCGGTAGTAGGGCGGGCGGCATCGCTCGGGGCGGGCTGA Majority
-----+-----+-----+-----+-----+-----+
          190         200         210         220         230         240
-----+-----+-----+-----+-----+
..... Ab-IGS-1S
..... Ab-ETS-4
..... Ab-ETS-5
..... Ab-ETS-6
..... Ab-ETS-7
..... Ab-ETS-8
..... Ab-ETS-9
..... Ab-ETS-10
..... Ab-ETS-11
..... Ab-ETS-12
..... Ab-ETS-14
..... Ab-ETS-15
..... Ab-ETS-16
..... Ab-ETS-18
..... Ab-ETS-19
..... Ab-ETS-21

```

```

CGGCTACGGACGGGACAAGGCGGTGCTTTTCGTGTCGTGCGGTGAGTTCTAGACGCTTTTG Majority
-----+-----+-----+-----+-----+
          250         260         270         280         290         300
-----+-----+-----+-----+-----+
..... Ab-IGS-1S
..... Ab-ETS-4
..... Ab-ETS-5
..... Ab-ETS-6
..... Ab-ETS-7
..... Ab-ETS-8
..... Ab-ETS-9
..... Ab-ETS-10
..... Ab-ETS-11
..... Ab-ETS-12
..... Ab-ETS-14
..... Ab-ETS-15
..... Ab-ETS-16
..... Ab-ETS-18
..... Ab-ETS-19
..... Ab-ETS-21

```

```

TCTCTTGGCAAGCTCTAGGCGCCGGACGTACGGGGCTGAGCCGACGACCCGTCCGTCGCC Majority
-----+-----+-----+-----+-----+
          310         320         330         340         350         360
-----+-----+-----+-----+-----+
..... Ab-IGS-1S
..... Ab-ETS-4
..... Ab-ETS-5
..... Ab-ETS-6
..... Ab-ETS-7
..... Ab-ETS-8
..... Ab-ETS-9
..... Ab-ETS-10
..... Ab-ETS-11
..... Ab-ETS-12
..... Ab-ETS-14
..... Ab-ETS-15
..... Ab-ETS-16
..... Ab-ETS-18
..... Ab-ETS-19
..... Ab-ETS-21

```

**Volkov et al.: 5S and 45S ribosomal DNA of *Atropa***

```

GAACGTCCGCTGCGGGCGGTGTCGCCGTGCAGGCAGGCAGCTTGTCTGGCTTCATCACC Majority
-----+-----+-----+-----+-----+-----+
          370          380          390          400          410          420
-----+-----+-----+-----+-----+
..... Ab-IGS-1S
..... Ab-ETS-4
..... Ab-ETS-5
..... Ab-ETS-6
..... Ab-ETS-7
..... Ab-ETS-8
..... Ab-ETS-9
..... T . . . A . C . . . . . Ab-ETS-10
..... Ab-ETS-11
..... Ab-ETS-12
..... Ab-ETS-14
..... Ab-ETS-15
..... Ab-ETS-16
..... . . . . . A . . . . . Ab-ETS-18
..... Ab-ETS-19
..... . . . . . A . . . . . Ab-ETS-21

```

```

TCTACCTCCCCGGGGGGCGGGGGGATTATCGTGTCTAGCGGGACTTGCTCCGGACTCGC Majority
-----+-----+-----+-----+-----+-----+
          430          440          450          460          470          480
-----+-----+-----+-----+-----+
..... Ab-IGS-1S
..... Ab-ETS-4
..... Ab-ETS-5
..... Ab-ETS-6
..... Ab-ETS-7
..... Ab-ETS-8
..... Ab-ETS-9
..... A . . . G . . . . . C . . . . . Ab-ETS-10
..... Ab-ETS-11
..... Ab-ETS-12
..... Ab-ETS-14
..... Ab-ETS-15
..... Ab-ETS-16
..... Ab-ETS-18
..... Ab-ETS-19
..... Ab-ETS-21

```

```

AACGTCGGCATCGGAAGCGGCGCTCGGCATATAATGCCGGCGTCGGGGCCGTTGTTTG Majority
-----+-----+-----+-----+-----+-----+
          490          500          510          520          530          540
-----+-----+-----+-----+-----+
..... Ab-IGS-1S
..... Ab-ETS-4
..... Ab-ETS-5
..... Ab-ETS-6
..... Ab-ETS-7
..... Ab-ETS-8
..... . . . . . C . . . . . Ab-ETS-9
..... . . . . . C . . . . . Ab-ETS-10
..... Ab-ETS-11
..... Ab-ETS-12
..... Ab-ETS-14
..... Ab-ETS-15
..... Ab-ETS-16
..... Ab-ETS-18
..... Ab-ETS-19
..... Ab-ETS-21

```

**Volkov et al.: 5S and 45S ribosomal DNA of *Atropa***

CACGCGACGACGAAGCATTGGACGCACGGCGGTGAGTGGTGTCTGGGCGTGTGCGGTTA Majority

-----+-----+-----+-----+-----+-----+  
          550      560      570      580      590      600  
-----+-----+-----+-----+-----+-----+

..... Ab-IGS-1S  
..... Ab-ETS-4  
..... Ab-ETS-5  
..... Ab-ETS-6  
..... Ab-ETS-7  
..... Ab-ETS-8  
.G..... Ab-ETS-9  
.G..... Ab-ETS-10  
..... Ab-ETS-11  
..... Ab-ETS-12  
..... Ab-ETS-14  
.....G..... Ab-ETS-15  
..... Ab-ETS-16  
..... Ab-ETS-18  
..... Ab-ETS-19  
..... Ab-ETS-21

GGTTGGATCCCTGCTCGAGCAGCGACCTCTTAGCCCGCACGCAGGGTCAGTCGGGGGACA Majority

-----+-----+-----+-----+-----+-----+  
          610      620      630      640      650      660  
-----+-----+-----+-----+-----+-----+

..... Ab-IGS-1S  
..... Ab-ETS-4  
..... Ab-ETS-5  
..... Ab-ETS-6  
..... Ab-ETS-7  
..... Ab-ETS-8  
..... Ab-ETS-9  
..... Ab-ETS-10  
..... Ab-ETS-11  
..... Ab-ETS-12  
..... Ab-ETS-14  
..... Ab-ETS-15  
..... Ab-ETS-16  
..... Ab-ETS-18  
.....C..... Ab-ETS-19  
..... Ab-ETS-21

AGCGCCGCAAGGGCTTGCCCGAAGTCGGTTTCCAGTGTGCATACCTAATGCCCGGCAT Majority

-----+-----+-----+-----+-----+-----+  
          670      680      690      700      710      720  
-----+-----+-----+-----+-----+-----+

..... Ab-IGS-1S  
..... Ab-ETS-4  
..... Ab-ETS-5  
..... Ab-ETS-6  
..... Ab-ETS-7  
..... Ab-ETS-8  
..... Ab-ETS-9  
..... Ab-ETS-10  
..... Ab-ETS-11  
..... Ab-ETS-12  
..... Ab-ETS-14  
..... Ab-ETS-15  
..... Ab-ETS-16  
..... Ab-ETS-18  
..... Ab-ETS-19  
..... Ab-ETS-21

**Volkov et al.: 5S and 45S ribosomal DNA of *Atropa***

TATCACGTACGATCGGTTCGCCTTTTCGCCCGTCGCATCCAGCGTGCGGGCCGAACCACAAG Majority

```

-----+-----+-----+-----+-----+-----+
      730      740      750      760      770      780
-----+-----+-----+-----+-----+
..... Ab-IGS-1S
..... Ab-ETS-4
..... Ab-ETS-5
..... Ab-ETS-6
..... Ab-ETS-7
..... Ab-ETS-8
..... C..... Ab-ETS-9
..... Ab-ETS-10
..... Ab-ETS-11
..... Ab-ETS-12
..... Ab-ETS-14
..... Ab-ETS-15
..... Ab-ETS-16
..... Ab-ETS-18
..... Ab-ETS-19
..... Ab-ETS-21

```

CCGCTCCCGCGACCCACTCCTTCCCTCGCCTCGCCGCGCGATGGGGTGGTCCCGCGGAGGG Majority

```

-----+-----+-----+-----+-----+-----+
      790      800      810      820      830      840
-----+-----+-----+-----+-----+
..... Ab-IGS-1S
..... Ab-ETS-4
..... Ab-ETS-5
..... Ab-ETS-6
..... G..... Ab-ETS-7
..... Ab-ETS-8
..... T.....T.....T..... Ab-ETS-9
..... Ab-ETS-10
..... Ab-ETS-11
..... Ab-ETS-12
..... Ab-ETS-14
..... Ab-ETS-15
..... Ab-ETS-16
..... Ab-ETS-18
..... Ab-ETS-19
..... Ab-ETS-21

```

CGGTTCGGACTCTCGGATTCGGTAAACGCAGCGGGCACGGGGCATTCCCCCATCTGCCCT Majority

```

-----+-----+-----+-----+-----+-----+
      850      860      870      880      890      900
-----+-----+-----+-----+-----+
..... Ab-IGS-1S
..... Ab-ETS-4
..... Ab-ETS-5
..... Ab-ETS-6
..... Ab-ETS-7
..... Ab-ETS-8
..... A.....C.....G Ab-ETS-9
..... Ab-ETS-10
..... Ab-ETS-11
..... A..... Ab-ETS-12
..... Ab-ETS-14
..... Ab-ETS-15
..... Ab-ETS-16
..... Ab-ETS-18
..... Ab-ETS-19
..... Ab-ETS-21

```

**Volkov et al.: 5S and 45S ribosomal DNA of *Atropa***

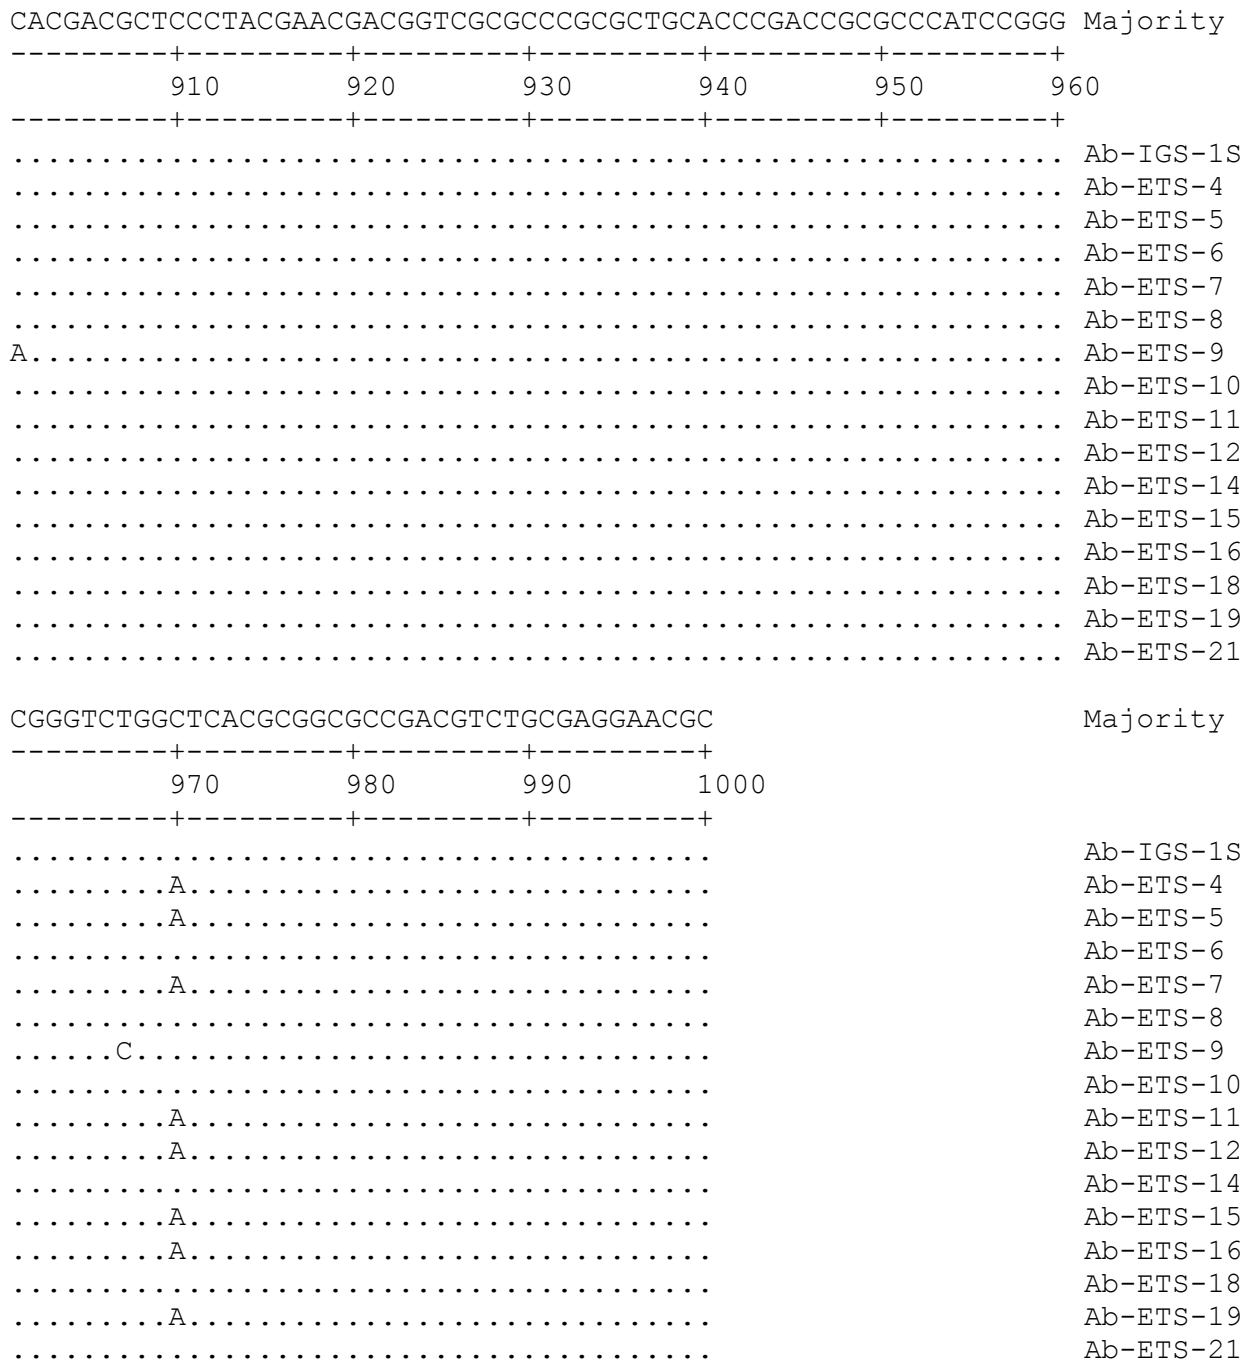

**Figure S6.** Nucleotide sequence comparison of individual copies of 5'ETS region of *Atropa belladonna* 45S rDNA. Sequence of presumptive TIS is presented in bold underlined.
